# Supplementary material
Source: HighWire-hosted journal article supplement (https://www.annfammed.org/highwire/filestream/787/field_highwire_adjunct_files/0/Scherrer_Supp_Apps.pdf)
Supplement: Scherrer_Supp_Apps.pdf [file Scherrer_Supp_Apps.pdf]

**Supplemental materials for:**

Scherrer JF, Morley JE, Salas J, Floyd JS, Farr SA, Dublin S. Association between metformin initiation and incident dementia Among African American and white Veterans Health Administration patients. *Ann Fam Med.* 2019;17(4):352-362.

### Supplemental Appendix 1. Detailed variable definitions

| Variable                 | Definition                                                                                                                                                                                                                                                                                                                                                                                                                                                                                                                                                                                                                                                                                                                                                                                                                                               |
|--------------------------|----------------------------------------------------------------------------------------------------------------------------------------------------------------------------------------------------------------------------------------------------------------------------------------------------------------------------------------------------------------------------------------------------------------------------------------------------------------------------------------------------------------------------------------------------------------------------------------------------------------------------------------------------------------------------------------------------------------------------------------------------------------------------------------------------------------------------------------------------------|
| Dementia Exclusion Codes | <p style="text-align: center;"><b><u>ICD-9 codes:</u></b></p> <p style="text-align: center;">046.1x 046.3 290.x 291.1 291.2<br/>           294.0 294.1x 294.2x 331.x 332.x<br/>           333.0 333.4 438.0 780.93 797</p>                                                                                                                                                                                                                                                                                                                                                                                                                                                                                                                                                                                                                               |
| Dementia Outcome Codes   | <p style="text-align: center;"><b><u>ICD-9 codes:</u></b></p> <p style="text-align: center;">290.0 290.1x 290.2x 290.3 290.4x 294.1x<br/>           294.2x 331.0 331.1x 331.2 331.82</p> <p style="text-align: center;">- Pool inpatient, outpatient, and Medicare codes</p> <p style="text-align: center;">- 2 codes on same day count as 1 code.</p> <p style="text-align: center;">- 2 code occurrences within the same 12 month period</p> <p style="text-align: center;">- Date of dementia onset is the first date of diagnosis when criteria met</p>                                                                                                                                                                                                                                                                                              |
| HbA1c levels             | Laboratory value in year prior and closest to metformin or sulfonylurea use.                                                                                                                                                                                                                                                                                                                                                                                                                                                                                                                                                                                                                                                                                                                                                                             |
| Glycemic burden          | <p>Average monthly glycemic burden (AMGB) is the average A1c units per month over 7.5 and is computed by dividing the total glycemic burden by the number of months between the first and last A1c measure relevant to the research design. Total glycemic burden is the cumulative amount by which A1c exceeds 7.5. It is assumed that the change between a pair of measurements represents a linear function such that the resulting total glycemic burden is an estimate of the area under the curve (e.g. sum of the differences between measured or interpolated A1c and threshold over all observed months). Each unit of total glycemic burden represents 1 month of an A1c that is one percentage point higher than an A1c &gt; 7.5. AMGB calculated from first value after metformin or sulfonylurea start date to last value before end of</p> |

|                             |                                                                                                                                                                                                  |
|-----------------------------|--------------------------------------------------------------------------------------------------------------------------------------------------------------------------------------------------|
|                             | follow-up.                                                                                                                                                                                       |
| Creatinine lab value        | Laboratory value in year prior and closest to metformin or sulfonylurea start date.                                                                                                              |
| Diabetic Nephropathy NOS    | ICD-9 code: 249.4x, 250.40, 250.42, 583.81<br>Single occurrence. Date of onset = Date of first code                                                                                              |
| Diabetic Retinopathy        | ICD-9 code: 249.5x, 250.50, 250.52, 362.0x<br>Single occurrence. Date of onset = Date of first code                                                                                              |
| Diabetic Neuropathy         | ICD-9-CM: 249.6x, 250.60, 250.62, 337.1, 357.2<br>Single occurrence. Date of onset = Date of first code                                                                                          |
| Smoking/nicotine dependence | ICD-9-CM code: V15.82 <u>OR</u> 305.1; or presence in health factor data as current smoker. Single occurrence. Date of onset = Date of first code/occurrence                                     |
| Obesity                     | ICD-9-CM code: 278.00, 278.01 OR BMI $\geq$ 30 for last BMI before/on start of metformin or sulfonylurea use<br>Single occurrence. Date of onset = Date of first code (or initial BMI $\geq$ 30) |
| Hypertension                | ICD-9-CM code: 401.x<br>Single occurrence. Date of onset = Date of first code                                                                                                                    |
| Hyperlipidemia              | ICD-9-CM code: 272.0, 272.1, 272.2, 272.4<br>Single occurrence. Date of onset = Date of first code                                                                                               |
| Stroke or cerebrovascular   | ICD-9-CM code: 431.x, 434.x, 438.x                                                                                                                                                               |

|                                |                                                                                                                                                                                                                                                                                                                  |
|--------------------------------|------------------------------------------------------------------------------------------------------------------------------------------------------------------------------------------------------------------------------------------------------------------------------------------------------------------|
| accident                       | Single occurrence. Date of onset = Date of first code                                                                                                                                                                                                                                                            |
| Ischemic heart disease         | ICD-9-CM code: 410.x-414.x<br>Single occurrence. Date of onset = Date of first code                                                                                                                                                                                                                              |
| Congestive heart failure       | ICD-9-CM code: 398.91, 402.11, 402.91, 404.11,<br>404.13, 404.91, 404.93, 428.x<br>Single occurrence. Date of onset = Date of first code                                                                                                                                                                         |
| Atrial fibrillation of flutter | ICD-9-CM code: 427.3x<br>Single occurrence. Date of onset = Date of first code                                                                                                                                                                                                                                   |
| Traumatic brain injury         | ICD-9-CM code: 800.x-804.x, 850.x-854.x, 905.x, 907.x, 959.01, V15.52<br>Single occurrence. Date of onset = Date of first code                                                                                                                                                                                   |
| Vitamin B12 deficiency         | ICD-9-CM code: 266.2, 281.1<br>Single occurrence. Date of onset = Date of first code                                                                                                                                                                                                                             |
| Depression                     | ICD-9-CM codes: 296.2x, 296.3x, 311<br>2 outpatient occurrences must occur in same 12 month period OR 1 inpatient occurrence.<br>Date of depression onset:<br>- If first episode in record is outpatient: date of second ICD-9-CM code<br>- If first episode in record is inpatient: date of inpatient discharge |

|                                      |                                                                                                                                                                                                                                                                                                                                                                                                                                                                                                                                                 |
|--------------------------------------|-------------------------------------------------------------------------------------------------------------------------------------------------------------------------------------------------------------------------------------------------------------------------------------------------------------------------------------------------------------------------------------------------------------------------------------------------------------------------------------------------------------------------------------------------|
| PTSD                                 | <p style="text-align: center;">ICD-9-CM codes: 309.81</p> <p style="text-align: center;">2 outpatient occurrences must occur in same 12 month period OR 1 inpatient occurrence.</p> <p style="text-align: center;">Date of PTSD onset:</p> <ul style="list-style-type: none"> <li>- If first episode in record is outpatient: date of second ICD-9-CM code</li> <li>- If first episode in record is inpatient: date of inpatient discharge</li> </ul>                                                                                           |
| Any anxiety disorder other than PTSD | <p style="text-align: center;">ICD-9-CM codes:</p> <p style="text-align: center;">2 outpatient occurrences must occur in same 12 month period OR 1 inpatient occurrence.</p> <p style="text-align: center;">Composite of panic disorder (300.01), generalized anxiety disorder (300.02), social phobia (300.23), obsessive compulsive disorder (300.3) and anxiety disorder not otherwise specified (300.00)</p> <p style="text-align: center;">Date of any other anxiety disorder onset = minimum date associated with composite variables</p> |
| Bipolar Disorder                     | <p style="text-align: center;">Single occurrence of ICD-9-CM codes 296.0x, 296.1x, 296.4x, 296.5x, 296.6x, 296.7x, 296.8x, 296.9x</p> <p style="text-align: center;">Date of onset=date of first code</p>                                                                                                                                                                                                                                                                                                                                       |
| Schizophrenia                        | <p style="text-align: center;">Single occurrence of ICD-9-CM codes 295.x</p> <p style="text-align: center;">Date of onset=date of first code</p>                                                                                                                                                                                                                                                                                                                                                                                                |
| Alcohol abuse/dependence             | <p style="text-align: center;">ICD-9-CM codes: 303.9x, 305.0x</p> <p style="text-align: center;">Single occurrence. Date of onset = Date of first code</p>                                                                                                                                                                                                                                                                                                                                                                                      |
| Any drug abuse/dependence            | <p style="text-align: center;">ICD-9-CM code: Single occurrence</p> <p style="text-align: center;">Composite of sedative (304.1x, 305.4x), cocaine (304.2x, 305.6x), cannabis (304.3x, 305.2x), amphetamine (304.4x, 305.7x), hallucinogens (304.5x, 305.3x), 'other' (304.6x, 305.9x), opioid (304.0x, 305.5x), opioid with other SUD (304.7x), other SUD excluding opioid (304.8x), unspecified drug</p>                                                                                                                                      |

|                                      |                                                                                                                                                                                                                                                                                                                                                                                                                                                                                                                                                                                                                                                                                                                                                                                                                                                                                                                                                                                                                                                                                                                                                                                                                                                                                                                                                                                                                                                         |
|--------------------------------------|---------------------------------------------------------------------------------------------------------------------------------------------------------------------------------------------------------------------------------------------------------------------------------------------------------------------------------------------------------------------------------------------------------------------------------------------------------------------------------------------------------------------------------------------------------------------------------------------------------------------------------------------------------------------------------------------------------------------------------------------------------------------------------------------------------------------------------------------------------------------------------------------------------------------------------------------------------------------------------------------------------------------------------------------------------------------------------------------------------------------------------------------------------------------------------------------------------------------------------------------------------------------------------------------------------------------------------------------------------------------------------------------------------------------------------------------------------|
|                                      | <p>abuse/dependence (304.9x).<br/>Date of onset = minimum date associated with composite variables</p>                                                                                                                                                                                                                                                                                                                                                                                                                                                                                                                                                                                                                                                                                                                                                                                                                                                                                                                                                                                                                                                                                                                                                                                                                                                                                                                                                  |
| High health services utilization     | <p>To control for detection bias related to more health care encounters, we compute a healthcare utilization variable defined as average number of outpatient clinic visits per month. Total visits is total number of visits in time period of interest. Number of months followed is months from first visit to last visit in time period of interest. Time period of interest is first visit in respective data time frames to metformin/sulfonylurea start. The distribution of the mean is then dichotomized into high utilizer, &gt;75<sup>th</sup> percentile vs low utilizer, ≤75<sup>th</sup> percentile.</p>                                                                                                                                                                                                                                                                                                                                                                                                                                                                                                                                                                                                                                                                                                                                                                                                                                  |
| Other medications, yes v no          | <p>Anticholinergic, NSAID, antihypertensive, Statins – defined by any sustained use. Sustained use is at least 2 fills in any 6 month period prior to metformin or sulfonylurea start date.</p>                                                                                                                                                                                                                                                                                                                                                                                                                                                                                                                                                                                                                                                                                                                                                                                                                                                                                                                                                                                                                                                                                                                                                                                                                                                         |
| Age                                  | <p>Age in years calculated on October 1, 2001 (FY02).</p>                                                                                                                                                                                                                                                                                                                                                                                                                                                                                                                                                                                                                                                                                                                                                                                                                                                                                                                                                                                                                                                                                                                                                                                                                                                                                                                                                                                               |
| Gender                               | <p>Male, female</p>                                                                                                                                                                                                                                                                                                                                                                                                                                                                                                                                                                                                                                                                                                                                                                                                                                                                                                                                                                                                                                                                                                                                                                                                                                                                                                                                                                                                                                     |
| Marital status                       | <p>Married vs. other (on/closest to date of metformin or sulfonylurea start date).</p>                                                                                                                                                                                                                                                                                                                                                                                                                                                                                                                                                                                                                                                                                                                                                                                                                                                                                                                                                                                                                                                                                                                                                                                                                                                                                                                                                                  |
| Neighborhood SES (nSES) (High v Low) | <p>Use zip code on/closest to date of metformin or sulfonylurea.<br/>The neighborhood SES index was based on information from 7 measures of SES obtained from 2009-2013 5-year census estimates from the American Community Survey. The value of each variable was assigned based on US 5-digit zip code. The 7 variables included: 1) Percent of households with income below the poverty level, 2) Percent of households receiving public assistance, 3) Percent of households with an annual income below \$35,000, 4) Percent of adult males age 20-64 not in the labor force, 5) Percent of adults 25 and older with less than high school education, 6) log of median household income, and 7) log of median value of single family homes (Roblin, 2013). Median household income and value of single family homes were log transformed so that values were on a similar scale to the other five measures. Using a principal components analysis on all US zip codes and their corresponding 7 measures of SES, a standardized factor score was assigned to each US zip code. <i>A higher standardized factor score indicates lower SES.</i> Standardized factor scores computed from all US zip codes were then matched to zip codes in the patient dataset. Based on SES factor score distribution in each patient cohort, patients were assigned to high nSES by a median split, where below median is high and at or above median is low.</p> |

|                                         |                                                                                                                                                               |
|-----------------------------------------|---------------------------------------------------------------------------------------------------------------------------------------------------------------|
| VA only health insurance vs. VA+private | Insurance status variable indicating any access to non-VA health insurance. Coverage defined by most frequently occurring prior to metformin or sulfonylurea. |
| Year of observation                     | 2002-2004, 2005-2006, 2007-2008, 2009-2010, 2011-2012                                                                                                         |

**Supplemental Appendix 2**

**Incidence of dementia in patients with a new metformin fill or a new sulfonylurea fill between FY2002 to FY2006 stratified by age within race groups, among among VHA patients  $\geq 50$  years old (n=73,761)**

|                  | Overall (n=73,761) |             |                | Metformin (n=55,859) |             |                | Sulfonylurea (n=17,902) |             |                |
|------------------|--------------------|-------------|----------------|----------------------|-------------|----------------|-------------------------|-------------|----------------|
| Race*Age         | Total              | Incidence % | Incidence rate | Total                | Incidence % | Incidence rate | Total                   | Incidence % | Incidence rate |
| White            | 63,202             | 7.3%        | 11.4/1000PY    | 47,821               | 6.4%        | 10.1/1000PY    | 15,381                  | 9.9%        | 15.4/1000PY    |
| 50-64            | 40811              | 2.8%        | 4.2/1000PY     | 32,914               | 2.7%        | 4.1/1000PY     | 7,897                   | 3.3%        | 4.8/1000PY     |
| 65-74            | 16414              | 12.4%       | 19.9/1000PY    | 11,633               | 12.0%       | 19.2/1000PY    | 4,781                   | 13.4%       | 21.7/1000PY    |
| $\geq 75$        | 5977               | 23.4%       | 45.4/1000PY    | 3,274                | 24.1%       | 46.2/1000PY    | 2,703                   | 22.6%       | 44.5/1000PY    |
| African-American | 10,559             | 5.6%        | 8.6/1000PY     | 8,038                | 4.7%        | 7.3/1000PY     | 2,521                   | 8.5%        | 12.6/1000PY    |
| 50-64            | 8325               | 2.8%        | 4.2/1000PY     | 6,543                | 2.4%        | 3.6/1000PY     | 1,782                   | 4.3%        | 6.2/1000PY     |
| 65-74            | 1824               | 14.0%       | 22.5/1000PY    | 1,276                | 12.8%       | 20.6/1000PY    | 548                     | 16.8%       | 26.9/1000PY    |
| $\geq 75$        | 410                | 25.1%       | 46.3/1000PY    | 219                  | 26.9%       | 49.5/1000PY    | 191                     | 23.0%       | 42.6/1000PY    |

Note: VHA=Veterans Health Administration; FY=Fiscal Year; MET=Metformin; SU=Sulfonylurea; PY=person-years
